# Supplementary material for: Robotic hernia repair II. English version
Source: Springer Nature journal article supplement (doi:10.1007/s00104-021-01479-6), 2021-08-10
Supplement: MOESM4 [file 19558920]

Patient ID

Date: \_\_\_\_ / \_\_\_\_ / \_\_\_\_

Surgeon: \_\_\_\_\_

### rv-TAPP/r-Rives (lateral approach)

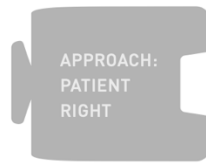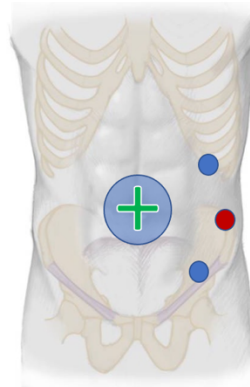

Right arm extended  
Align patient to the left border  
of the OR-table  
Left arm below level of table

DaVinci anatomy:  
• Lower abdomen

DaVinci position:  
• Patient right

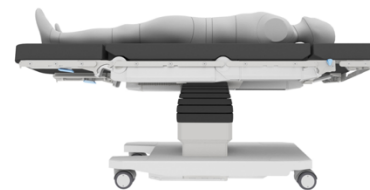

### Perioperative Procedures/daVinci Checklist (Note: Does not replace the WHO Team Time-Out).

I have reviewed the patient informed consent sheet and checked it for content and comments:  Yes  No

Perioperative antibiotics:  Yes  Cefuroxim 1,5g to 3g (Alternative:  Clindamycin 600mg)

Hybrid-Procedure:  Yes  No If yes, inform nurse to prepare additional instruments.

**Before docking:** Distance of trocar line to symphysis is approximately 20cm:  Yes  No

It is a large scrotal hernia, scrotum should be disinfected:  Yes  No

Previous prostate radiation or prostate pre-surgery:  Yes  No

It is a recurrence:  Yes  No

If yes, senior surgeon was informed prior to start of surgery:  Yes  No

Ropivacaine infiltration of port incisions:  Yes  No

Laparoscopic visual inspection of port placement  Yes  No

**Console:** Complete adhaesiolysis of the abdominal wall:  Yes  No

**r-Rives (Synonym: r-TARUP):**

Entry into ipsilateral rectus sheath, far lateral:  Yes  No

**Caveat:** Crossover at medial border of the rectal sheath: second incision of the posterior rectus sheath, the linea alba should not be damaged.

**Caveat:** Instability of the linea alba if accidental entry through the anterior rectus sheath.

**Caveat:** Do not damage the thin umbilical skin.

Complete mobilisation of fatty tissue from hernia gaps:  Yes  No

Exclusion of further hernias up to the xiphoid:  Yes  No

Präparation in the spaces of Retzius- and Bogros needed:  Yes  No

Umbilical pit was reinserted with absorbable suture:  Yes  No

Transverse V-Loc-suture of the hernial gap:  Yes  No

Mesh-Measuring in cm; Fixation with loose absorbable stitches:  Yes  No

Running suture of ipsilateral posterior rectus sheath (V-Loc 3-0):  Yes  No

**rv-TAPP:**

As r-Rives, incise peritoneum to entry the preperitoneal plane:  Yes  No

Accidental tears of the peritoneum were sutured:  Yes  No

Alternative: Vicryl mesh interposition if large peritoneal tears:  Yes  No

|                   |                                                                |                                                          |
|-------------------|----------------------------------------------------------------|----------------------------------------------------------|
| <b>Finishing:</b> | Laparoscopic visual inspection of port removal:                | <input type="checkbox"/> Yes <input type="checkbox"/> No |
|                   | If 12mm port was used: transparietal suture closure performed: | <input type="checkbox"/> Yes <input type="checkbox"/> No |
|                   | OR data entered into registry:                                 | <input type="checkbox"/> Yes <input type="checkbox"/> No |
|                   | Normal postoperative prescription:                             | <input type="checkbox"/> Yes <input type="checkbox"/> No |

**Pre-stationary preparation:**  
 CT abdomen with transverse and sagittal sections (morphology and adhesions)  
 Würzburg incisional hernia classification  
 If hernia gap is more than 8cm wide, consider r-TAR or r-IPOM.

**Sutures and materials:**  
 V-Loc 180 (green) 3-0 USP V-20 (15cm)  
 Vicryl 3-0 SH (20cm)  
 Vicryl 3-0 without needle For mesh rolling up  
 Ruler  
 DynaMesh Endolap Visible 15x10cm mesh  
 (If necessary: Vicryl mesh 28x18cm)  
 (If necessary: Progrid mesh 30x15cm)  
 Marking pen

**Positioning of the patient on OR-table:**  
 Supine position  
 No pink pad needed  
 Right arm is extended  
 Patient lies flush left on operating table  
 Left arm slightly below body level  
  
 Planned OP time: 60-120min

**Instruments:**  
 30° optics  
 Prograsp Forceps  
 Mega SutureCut Needle Driver  
 Hot Shears MCS  
 3x 8mm daVinci Trocars  
 (event. 1x 12mm daVinci Trocar)

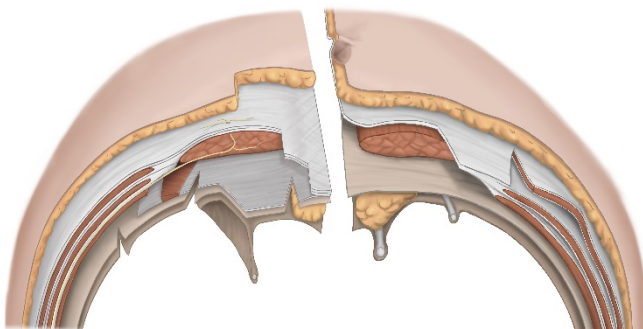

Supraumbilical planes      Infraumbilical planes

From: Dietz, Fortely, Beldi, Wiegering (Eds.) Offene Hernienchirurgie (2012) Springer Verlag

**Skin closure:**  
 Ropivacaine 0,5% 10ml  
 Caprosyn 4-0 USP with P-24 needle  
 Cyanoacrylate-Glue

**Postoperative prescription:**  
 Mobilisation on the same evening  
 No limitations for physical activities after day 3

**CIRS-report:**  Yes  No

**Swiss DRG** G09D, Target dwell time: 0 | 3 | 9 days

Planned discharge: \_\_\_\_/\_\_\_\_/\_\_\_\_

| Occurrence    | M = morphology  | S = size (cm) | RF = risk factors (+ → ++++) |
|---------------|-----------------|---------------|------------------------------|
| p (primary)   | m (median)      | a x b         | Obesity (BMI >25)            |
| r (recurrent) | u (umbilical)   |               | Male gender                  |
|               | sp (suprapubic) |               | Nicotine abuse               |
|               | sc (subcostal)  |               | Wound contamination          |
|               | t (transversal) |               | Age > 45 years               |
|               | l (lumbal)      |               | Disease                      |
|               | pm (paramedian) |               | 2nd laparot. < 1 month       |
|               | nc (other)      |               | Emergency procedure          |
|               |                 |               | Postop. Complications        |
|               |                 |               | ...                          |

v/i M... S...x... RF...

**Debriefing: What can be done better in the next surgery?**
